# Supplementary material for: Heterologous Biosynthesis of Myxobacterial Antibiotic Miuraenamide A
Source: MDPI journal article supplement (doi:10.3390/molecules28062815), 2023-03-20
Supplement: s1 [file s1]

Supplementary Materials

# Heterologous Biosynthesis of Myxobacterial Antibiotic Miuraenamide A

Ying Liu, Satoshi Yamazaki and Makoto Ojika \*

Department of Applied Biosciences, Graduate School of Bioagricultural Sciences, Nagoya University,  
Nagoya 464-8601, Japan

\* Correspondence: [ojika@agr.nagoya-u.ac.jp](mailto:ojika@agr.nagoya-u.ac.jp)

## Contents

**Table S1.** Bacterial strains used in this study.

**Table S2.** Plasmids used in this study.

**Table S3.** Primers used in this study.

**Figure S1.** Construction of *M. xanthus::miu*.

**Figure S2.** Construction of *M. xanthus::miu ΔmiuD*.

**Figure S3.** Construction of *M. xanthus::miu ΔmiuE*.

**Figure S4.** Construction of *M. xanthus::miu ΔmiuF*.

**Figure S5.** Construction of *M. xanthus::miu ΔmiuG*.

**Figure S6.** Construction of *M. xanthus::miu Δorf25-29*.

**Figure S7.** Construction of *M. xanthus::miu Δorf25-29&1-10*.

**Figure S8.** Construction of *M. xanthus::miu Δorf25-29&14-16*.

**Figure S9.** Construction of *M. xanthus::miu Δorf25-29&19-23*.

**Figure S10.** Mass spectra of miuraenamide A and its congeners.

**Figure S11.** Production of miuraenamide A (**1**) and its congeners by *M.xanthus::miu* mutant fed on bromotyrosine.

**Figure S12.** Enantiomeric excess of 3-bromo-D and L-tyrosines determined by Marfey's method.

**Table S1.** Bacterial strains used in this study.

| Strain                                                    | Description                                                                                           |
|-----------------------------------------------------------|-------------------------------------------------------------------------------------------------------|
| " <i>P. miuraensis</i> " SMH-27-4                         | Original miuraenamamide A producer (Ajinomoto)                                                        |
| <i>E.coli</i> HST08 premium                               | Cloning host for constructing genomic library (Takara bio)                                            |
| <i>E.coli</i> DH5 $\alpha$                                | General cloning host (Toyobo)                                                                         |
| <i>E.coli</i> SW105                                       | Red/ET recombineering host (NCI)                                                                      |
| <i>M. xanthus</i> ATCC 25232                              | Wild type, heterologous expression host (Ajinomoto)                                                   |
| <i>M. xanthus::miu</i>                                    | Heterologous transformant expressing miuraenamamide A biosynthetic gene cluster ( <i>miu</i> cluster) |
| <i>M. xanthus::miu</i> $\Delta$ <i>miuD</i>               | <i>miuD</i> gene-disrupted <i>M. xanthus::miu</i>                                                     |
| <i>M. xanthus::miu</i> $\Delta$ <i>miuE</i>               | <i>miuE</i> gene-disrupted <i>M. xanthus::miu</i>                                                     |
| <i>M. xanthus::miu</i> $\Delta$ <i>miuF</i>               | <i>miuF</i> gene-disrupted <i>M. xanthus::miu</i>                                                     |
| <i>M. xanthus::miu</i> $\Delta$ <i>miuG</i>               | <i>miuG</i> gene-disrupted <i>M. xanthus::miu</i>                                                     |
| <i>M. xanthus::miu</i> $\Delta$ <i>orf25-29</i>           | <i>orf25-29</i> genes-disrupted <i>M. xanthus::miu</i>                                                |
| <i>M. xanthus::miu</i> $\Delta$ <i>orf25-29&amp;1-10</i>  | <i>orf25-29</i> and <i>orf1-10</i> genes-disrupted <i>M. xanthus::miu</i>                             |
| <i>M. xanthus::miu</i> $\Delta$ <i>orf25-29&amp;14-16</i> | <i>orf25-29</i> and <i>orf14-16</i> genes-disrupted <i>M. xanthus::miu</i>                            |
| <i>M. xanthus::miu</i> $\Delta$ <i>orf25-29&amp;19-23</i> | <i>orf25-29</i> and <i>orf19-23</i> genes-disrupted <i>M. xanthus::miu</i>                            |

**Table S2.** Plasmids used in this study.

| Plasmid                                           | Description                                                                                                                   |
|---------------------------------------------------|-------------------------------------------------------------------------------------------------------------------------------|
| pCCIBAC                                           | BAC cloning vector, Chl <sup>R</sup> (Epicentre)                                                                              |
| p17-9A                                            | pCCIBAC-derived, harbouring <i>miu</i> cluster, Chl <sup>R</sup>                                                              |
| pTA-Kan <sup>R</sup>                              | pGEM-T easy vector-derived, harbouring 1.8 kb <i>M. xanthus</i> homologous fragment, Amp <sup>R</sup> , Kan <sup>R</sup> [31] |
| p5TA-Kan <sup>R</sup>                             | pTA-Kan <sup>R</sup> -derived, harbouring 5 kb <i>M. xanthus</i> homologous fragment, Amp <sup>R</sup> , Kan <sup>R</sup>     |
| <i>miu</i> BAC                                    | p17-9A-derived, harbouring <i>miu</i> cluster, 5TA, Kan <sup>R</sup>                                                          |
| <i>miu</i> BAC $\Delta$ <i>miuD</i>               | <i>miu</i> BAC-derived, <i>miuD</i> gene was disrupted, Chl <sup>R</sup> , Kan <sup>R</sup>                                   |
| <i>miu</i> BAC $\Delta$ <i>miuE</i>               | <i>miu</i> BAC-derived, <i>miuE</i> gene was disrupted, Chl <sup>R</sup> , Kan <sup>R</sup>                                   |
| <i>miu</i> BAC $\Delta$ <i>miuF</i>               | <i>miu</i> BAC-derived, <i>miuF</i> gene was disrupted, Chl <sup>R</sup> , Kan <sup>R</sup>                                   |
| <i>miu</i> BAC $\Delta$ <i>miuG</i>               | <i>miu</i> BAC-derived, <i>miuG</i> gene was disrupted, Chl <sup>R</sup> , Kan <sup>R</sup>                                   |
| <i>miu</i> BAC $\Delta$ <i>orf25-29</i>           | p17-9A-derived, harbouring <i>orf25-29</i> genes-disrupted <i>miu</i> cluster, 5TA, Kan <sup>R</sup>                          |
| <i>miu</i> BAC $\Delta$ <i>orf25-29&amp;1-10</i>  | <i>miu</i> BAC $\Delta$ <i>orf25-29</i> -derived, <i>orf1-10</i> genes were disrupted, Chl <sup>R</sup> , Kan <sup>R</sup>    |
| <i>miu</i> BAC $\Delta$ <i>orf25-29&amp;14-16</i> | <i>miu</i> BAC $\Delta$ <i>orf25-29</i> -derived, <i>orf14-16</i> genes were disrupted, Chl <sup>R</sup> , Kan <sup>R</sup>   |
| <i>miu</i> BAC $\Delta$ <i>orf25-29&amp;19-23</i> | <i>miu</i> BAC $\Delta$ <i>orf25-29</i> -derived, <i>orf19-23</i> genes were disrupted, Chl <sup>R</sup> , Kan <sup>R</sup>   |

**Table S3.** Primers used in this study.

| Primer          | Sequence                                                                        |
|-----------------|---------------------------------------------------------------------------------|
| pCC-BlnI 2 F    | atgcctaggatcctctagagtcgacctg                                                    |
| pCC-BlnI 2 R    | atgcctaggatccccgggtaccgagctc                                                    |
| miuBGC p F      | caaccaagacgggtcagagca                                                           |
| miuBGC p R      | ctgaacccgaacgaactcac                                                            |
| loTA Gib F      | aacagtgcagaggttcgggtgg                                                          |
| loTA Gib R      | cacggcgaacatccggaagaac                                                          |
| ploTA F         | ccaccgaacctctcactgtt                                                            |
| ploTA R         | tcttcggatgttcgctgcttttcaattcagaagaactcgtaag                                     |
| ploTA check F   | tctccgcccagtagacgaa                                                             |
| ploTA check R   | cattaggcacccaggcttt                                                             |
| ploTA-Kan red F | agcagtgacaggccgtagaggcttcgcatcgcgagatcggaatgagcataacagtgcagaggttcgggtg          |
| ploTA-Kan red R | cctgttgataccgggaagccctggccaactttggcgaaatgagacgtggcgcaagggtgctaaagg              |
| T1PKS1 cF       | ggcgaaggcgtggaggaatt                                                            |
| T1PKS1 cR       | cagttggcggcgcatagtt                                                             |
| T1PKS2 cF       | gacttctcgtgctgttctcctctt                                                        |
| T1PKS2 cR       | gaagcgacaaccgataccgatgat                                                        |
| NRPS cF         | gctggctgttcgttctggtcctc                                                         |
| NRPS cR         | tggcgggtggtgaatcggaagt                                                          |
| kanf            | cgtaagaaggcgatagaagg                                                            |
| pCC1BAC R       | accgttctgtccgtcacttc                                                            |
| loTA cF         | agccgaagcgataggtgag                                                             |
| loTA cR         | cactgccgttgtaggag                                                               |
| loupF           | aagtgcgtggttcggtcggagtagttc                                                     |
| loupR           | ttcagcatcgcaaccgcatcagactcc                                                     |
| 0lodownF        | gcatcgagctggtggaatttctggaacgc                                                   |
| 2lodownR        | agcagcaccacaccttctcaccatcc                                                      |
| Cm-miuD-F       | ccacctgcggcgaatcctcggaccaacgtgcgcaactatccaaaggcggtattcaggcgtagcaaccaggc<br>g    |
| Cm-miuD-R       | gggtcacgaacggcaccacgttcgtgtctcggcgtcgacccggactcgttgatcggcacgtaagagggtc<br>caa   |
| Cm-miuE-F       | cctgataggagacgatctgaagccggatgtctcgaccgcattgcggtagtagtattcaggcgtagcaaccaggc<br>g |
| Cm-miuE-R       | gggattccaccccgatcggtacagcgtcggttcacgaaattcctctgttgatcggcacgtaagagggtcc<br>aa    |
| Cm-miuF-F       | agacgaggctgcgcgagccccactcaccgagatgagcgcgtcgtgagttattcaggcgtagcaaccagg<br>cg     |
| Cm-miuF-R       | catggtgccgaaccacgcggcgatcggtacttcgagcgggtcctcggaagttgatcggcacgtaagagggt<br>caa  |
| Cm-miuG-F       | gttcgaggctctgctcggcgagttcggcgaggagttcggaccggtgaggtattcaggcgtagcaaccagg<br>cg    |
| Cm-miuG-R       | atccgcagccggatccacctagagcatcggtcgcgagcggcgacttcgagttgatcggcacgtaagagggt<br>caa  |
| 5TA-orf25-F     | agtagatcttcacgcccgcaccaggtgcacgcgcatcgagtcgttgaaacagtgcagaggttcgggtggt          |
| Cm-orf1-F       | tcgaggacgaggtactgcatgcgctcttcgaacagttcgtggtcagcattattcaggcgtagcaaccaggcg        |
| Cm-orf10-R      | acgaccgaccacggttggccacagtttggcccgcctcagtgccaatgttgatcggcacgtaagagggtc<br>caa    |
| Cm-orf14-F      | gacgaatgcctcgagcagcaggcgttgagcgcatttctgatctgaagtattcaggcgtagcaaccaggc<br>g      |
| Cm-orf16-R      | gccgagatcgaccagcagttcgtctgctcgtgtgctgggcatcaagttgatcggcacgtaagagggtc<br>caa     |
| Cm-orf19-F      | atcacttctgctcgtcaatcggtccaagaggtcaccgggtgaaggcctattcaggcgtagcaaccaggcg          |
| Cm-orf23-R      | tgagctggtggaccgagctgcgggatttggactcgagctcatccaggatgttgatcggcacgtaagagggtc<br>caa |
| Cm cF           | gggtattcactccagagcgat                                                           |

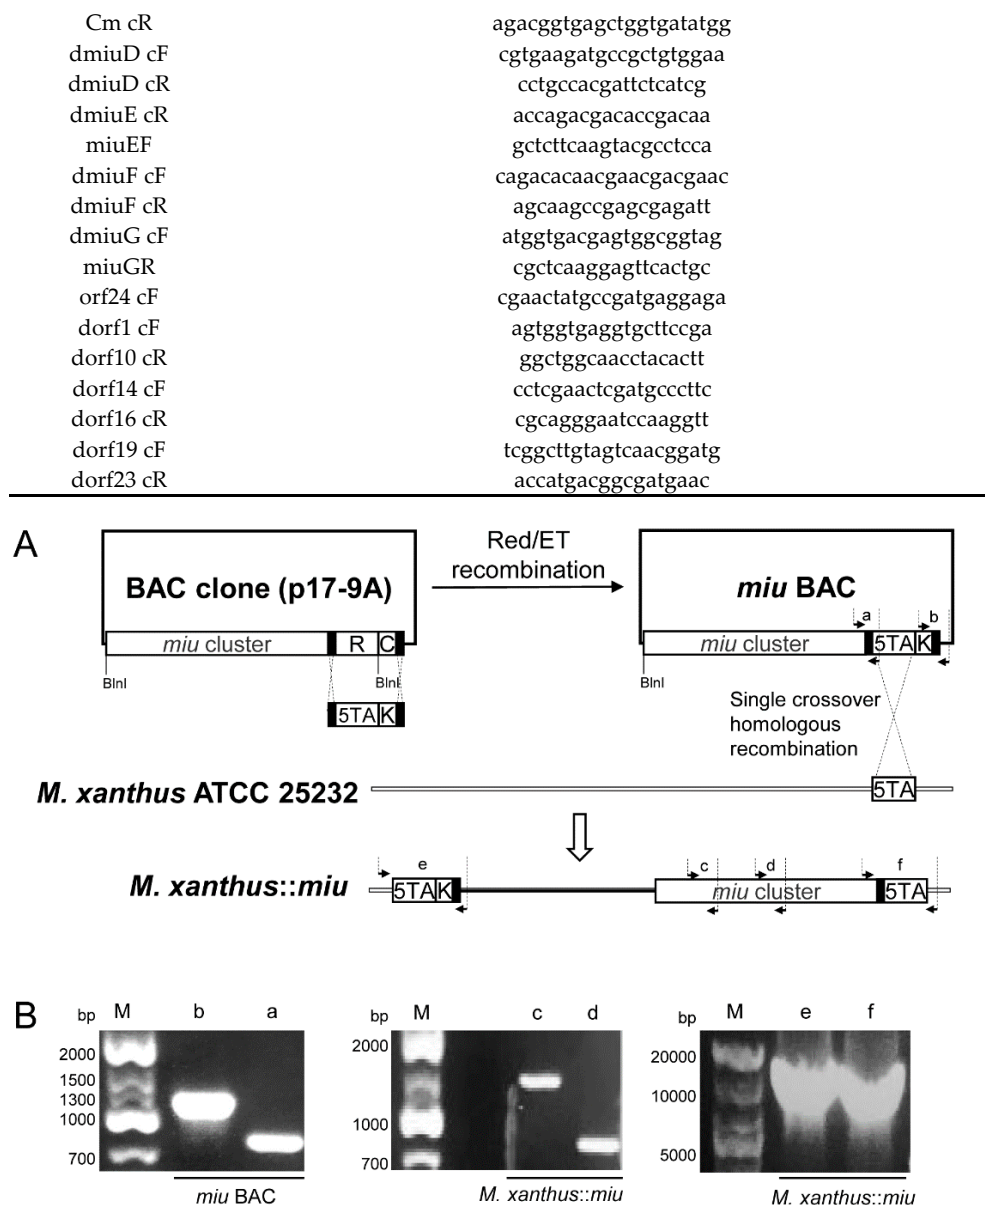

**Figure S1.** Construction of *M. xanthus::miu*. (A) The redundant fragment (genomic fragment outside the *miu* cluster) and chloramphenicol resistance gene (R|C) in the BAC clone p17-9A was replaced with the cassette 5TA-Kan<sup>R</sup> (5TA|K, amplified from p5TA-Kan<sup>R</sup> with primer pair ploTA-Kan red F/R) by Red/ET recombination. The generated *miu* BAC was integrated into the genome of *M. xanthus* ATCC 25232 by homologous recombination via the 5TA region. (B) PCR verification of the constructed vector and mutant by the following primer pairs: a (loTA cF/loTA cR, 886 bp), b (kanf/pCC1BAC R, 1299 bp), c (T1PKS1 cF/T1PKS1 cR, 1274 bp), d (T1PKS2 cF/T1PKS2 cR, 783 bp), e (loupF/loupR, 7957 bp), and f (OlodownF/2loldownR, 7488). M: DNA marker (Gene Ladder Wide 1, Nippon Gene).

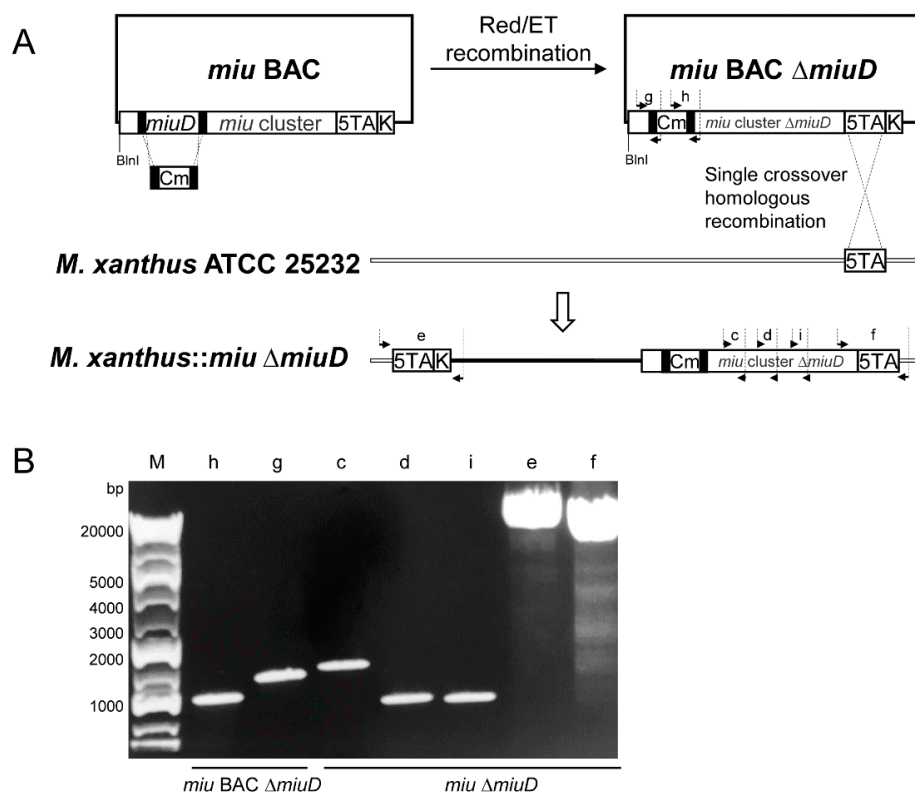

**Figure S2.** Construction of *M. xanthus::miu ΔmiuD*. (A) The gene *miuD* in *miu* BAC was replaced with the chloramphenicol resistance gene (Cm, amplified from pCCIBAC with primer pair Cm-*miuD*-F/R) by Red/ET recombination. The generated *miu* BAC Δ*miuD* was integrated into the genome of *M. xanthus* ATCC 25232 by homologous recombination via the 5TA region. (B) PCR verification of the constructed mutants by the following primer pairs: g (*dmiuD* cF/Cm cR, 1186 bp), h (Cm cF/*dmiuD* cR, 949 bp), c (T1PKS1 cF/T1PKS1 cR, 1274 bp), d (T1PKS2 cF/T1PKS2 cR, 783 bp), i (NRPS cF/NRPS cR, 756 bp), e (loupF/loupR, 7957 bp), and f (0lodownF/2lodownR, 7488 bp). M: DNA marker.

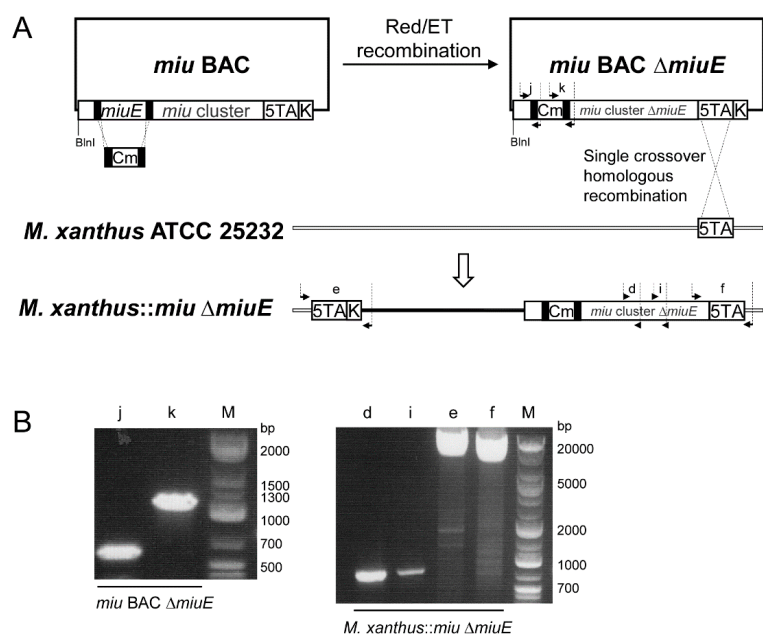

**Figure S3.** Construction of *M. xanthus::miu ΔmiuE*. (A) The gene *miuE* in *miu BAC* was replaced with the chloramphenicol resistance gene (Cm, amplified from pCCIBAC with primer pair Cm-*miuE*-F/R) by Red/ET recombination. The generated *miu BAC ΔmiuE* was integrated into the genome of *M. xanthus* ATCC 25232 by homologous recombination via the 5TA region. (B) PCR verification of the constructed mutants by the following primer pairs: j (*miuE*F/Cm cR, 599 bp), k (Cm cF/*dmiuE* cR, 1037 bp), d (T1PKS2 cF/T1PKS2 cR, 783 bp), i (NRPS cF/NRPS cR, 756 bp), e (*loupF*/*loupR*, 7957 bp), and f(*0lardownF*/*2lardownR*, 7488 bp). M: DNA marker.

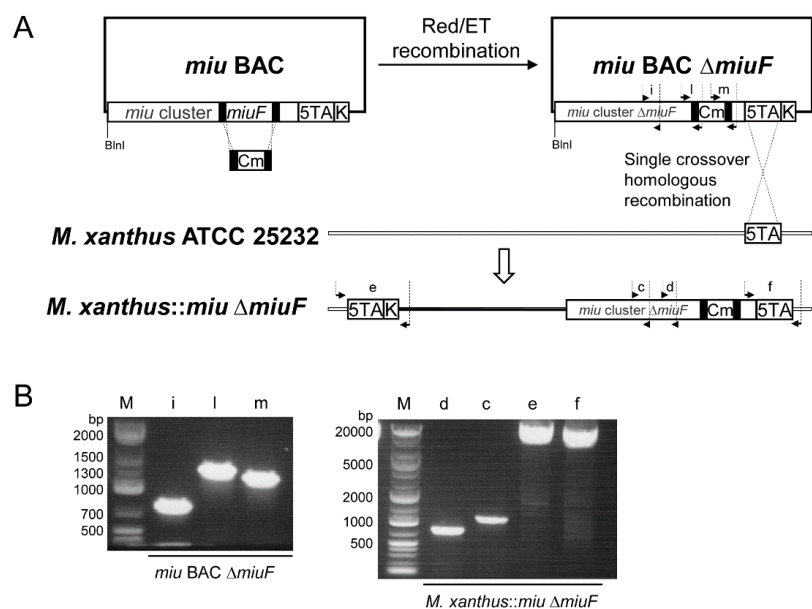

**Figure S4.** Construction of *M. xanthus::miu ΔmiuF*. (A) The gene *miuF* in *miu BAC* was replaced with the chloramphenicol resistance gene (Cm, amplified from pCCIBAC with primer pair Cm-*miuF*-F/R) by Red/ET recombination. The generated *miu BAC ΔmiuF* was integrated into the genome of *M. xanthus* ATCC 25232 by homologous recombination via the 5TA region. (B) PCR verification of the constructed mutants by the following primer pairs: i (NRPS cF/NRPS cR, 756 bp), l (*dmiuF* cF/Cm cR, 1201 bp), m (Cm cF/*dmiuF* cR, 1121 bp), c (T1PKS1 cF/T1PKS1 cR, 1274 bp), d (T1PKS2 cF/T1PKS2 cR, 783 bp), e (*loupF*/*loupR*, 7957 bp), and f (*0lardownF*/*2lardownR*, 7488 bp). M: DNA marker.

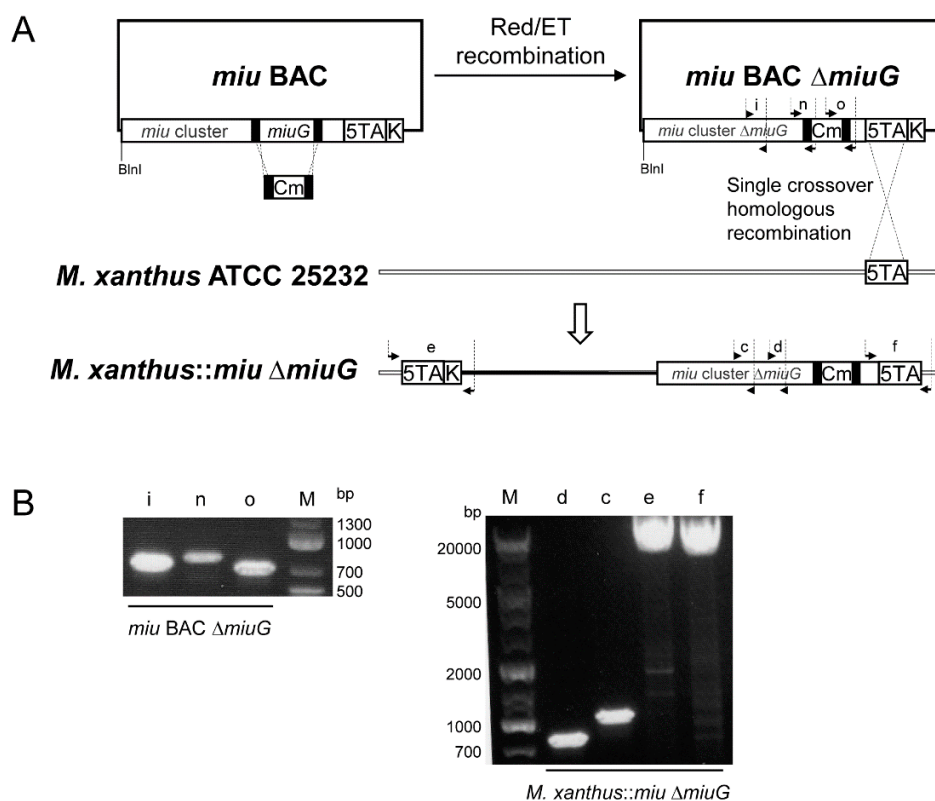

**Figure S5.** Construction of *M. xanthus::miu ΔmiuG*. (A) The gene *miuG* in *miu BAC* was replaced with the chloramphenicol resistance gene (Cm, amplified from pCCIBAC with primer pair Cm-*miuG*-F/R) by Red/ET recombination. The generated *miu BAC ΔmiuG* was integrated into the genome of *M. xanthus* ATCC 25232 by homologous recombination via the 5TA region. (B) PCR verification of the constructed mutants by the following primer pairs: i (NRPS cF/NRPS cR, 756 bp), n (*dmuG* cF/Cm cR, 778 bp), o (Cm cF/*miuGR*, 701 bp), c (T1PKS1 cF/T1PKS1 cR, 1274 bp), d (T1PKS2 cF/T1PKS2 cR, 783 bp), e (*loupF*/*loupR*, 7957 bp), and f (*OlodownF*/*OlodownR*, 7488 bp). M: DNA marker.

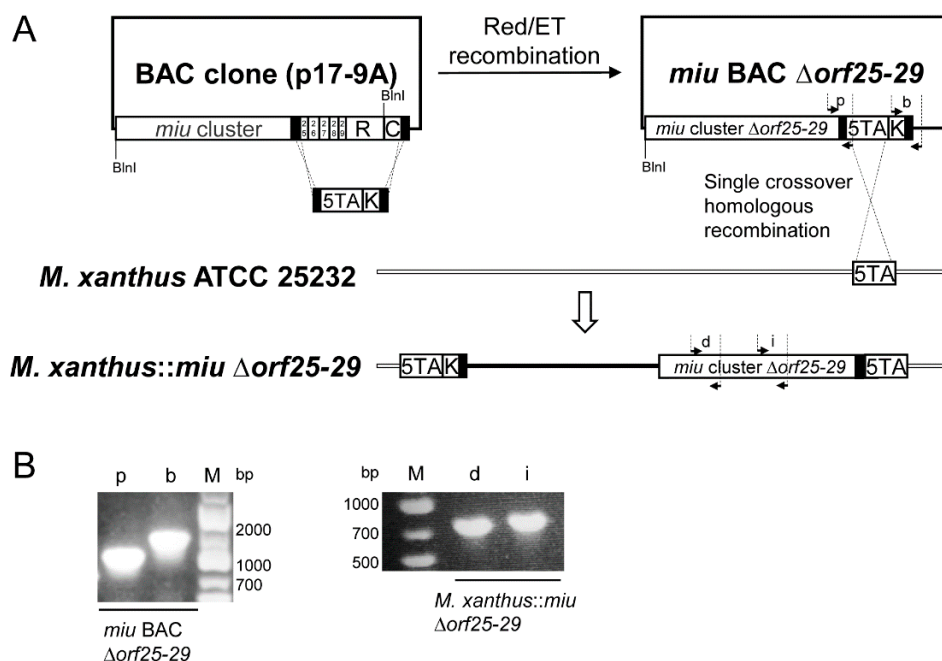

**Figure S6.** Construction of *M. xanthus*::*miu*  $\Delta$ orf25-29. (A) The gene region *orf25-29*, the redundant fragment and chloramphenicol resistance gene (25|26|27|28|29|R|C), in the BAC clone p17-9A was replaced with the cassette 5TA-Kan<sup>R</sup> (5TA|K, amplified from p5TA-Kan<sup>R</sup> with primer pair 5TA-*orf25*-F/*pl*oTA-Kan red R) by Red/ET recombination. The generated *miu* BAC  $\Delta$ orf25-29 was integrated into the genome of *M. xanthus* ATCC 25232 by homologous recombination via the 5TA region. (B) PCR verification of the constructed mutants by the following primer pairs: p (*orf24* cF/*lo*TA cR, 1020 bp), b (*kanf*/*pCC1*BAC R, 1299 bp), d (T1PKS2 cF/T1PKS2 cR, 783 bp), and i (NPRS cF/NRPS cR, 756 bp). M: DNA marker.



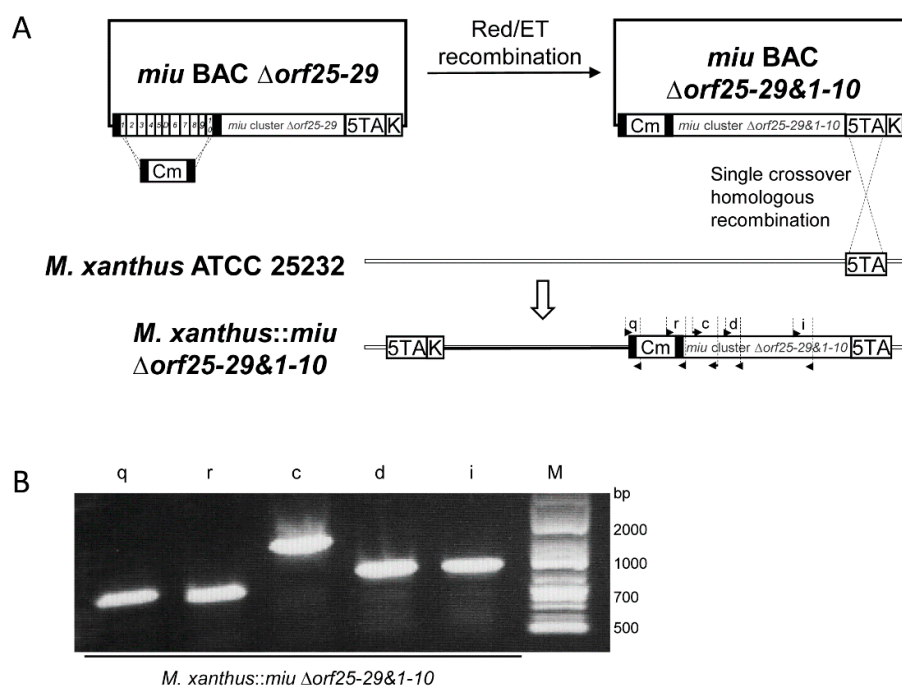

**Figure S7.** Construction of *M. xanthus::miu*  $\Delta orf25-29\&1-10$ . (A) The gene region *orf1-10* (1|2|3|4|5|D|6|7|8|9|10) in *miu* BAC  $\Delta orf25-29$  was replaced with the chloramphenicol resistance gene (Cm, amplified from pCCIBAC with primer pair Cm-*orf1*-F/ Cm-*orf10*-R) by Red/ET recombination. The generated *miu* BAC  $\Delta orf25-29\&1-10$  was integrated into the genome of *M. xanthus* ATCC 25232 by homologous recombination via the 5TA region. (B) PCR verification of *M. xanthus::miu*  $\Delta orf25-29\&1-10$  by the following primer pairs: q (*dorf1* cF/Cm cR, 694 bp), r (Cm cF/*dorf10* cR, 621 bp), c (T1PKS1 cF/T1PKS2 cR, 1274 bp), d (T1PKS2 cF/T1PKS2 cR, 783 bp), and i (NPRS cF/NRPS cR, 756 bp). M: DNA marker.

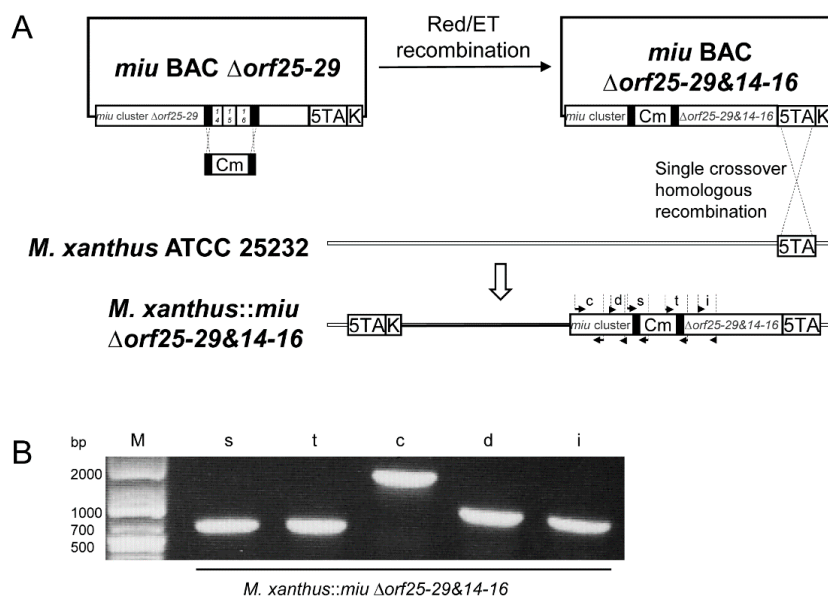

**Figure S8.** Construction of *M. xanthus::miu  $\Delta$ orf25-29&14-16*. (A) The gene region *orf14-16* (14|15|16) in *miu* BAC  $\Delta$ orf25-29 was replaced with the chloramphenicol resistance gene (Cm, amplified from pCCI-BAC with primer pair Cm-*orf14-F*/ Cm-*orf16-R*) by Red/ET recombination. The generated *miu* BAC  $\Delta$ orf25-29&14-16 was integrated into the genome of *M. xanthus* ATCC 25232 by homologous recombination via the 5TA region. (B) PCR verification of *M. xanthus::miu  $\Delta$ orf25-29&14-16* by the following primer pairs: s (*dorf14 cF*/Cm cR, 577 bp), t (Cm cF/*dorf16 cR*, 591 bp), c (T1PKS1 cF/T1PKS2 cR, 1274 bp), d (T1PKS2 cF/T1PKS2 cR, 783 bp), and i (NPRS cF/NRPS cR, 756 bp). M: DNA marker.

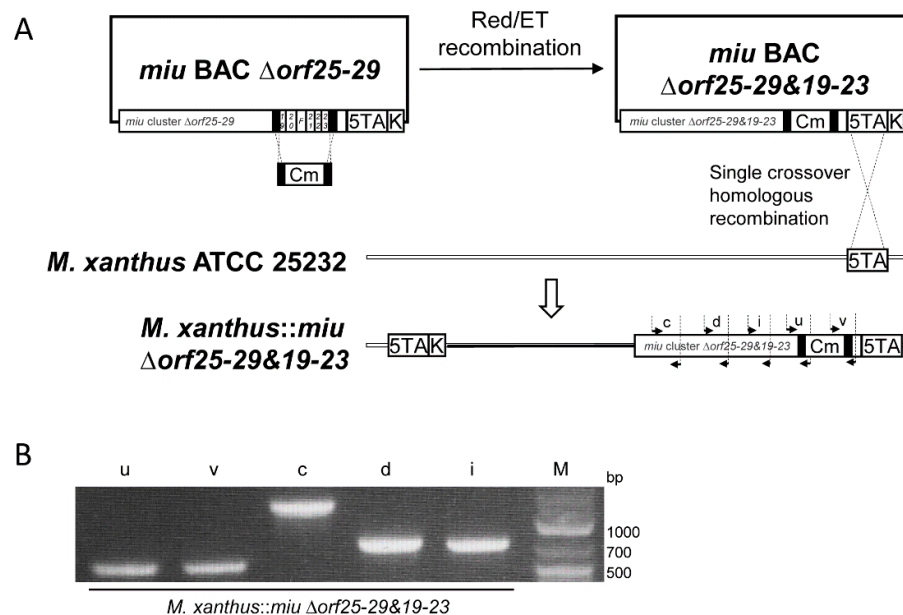

**Figure S9.** Construction of *M. xanthus::miu  $\Delta$ orf25-29&19-23*. (A) The gene region *orf19-23* (19|20|F|21|22|23) in *miu* BAC  $\Delta$ orf25-29 was replaced with the chloramphenicol resistance gene (Cm, amplified from pCCIBAC with primer pair Cm-*orf19-F*/ Cm-*orf23-R*) by Red/ET recombination. The generated *miu* BAC  $\Delta$ orf25-29&19-23 was integrated into the genome of *M. xanthus* ATCC 25232 by homologous recombination via the 5TA region. (B) PCR verification of *M. xanthus::miu  $\Delta$ orf25-29&19-23* by the following primer pairs: u (*dorf19 cF*/Cm cR, 582 bp), v (Cm cF/*dorf23 cR*, 576 bp), c (T1PKS1 cF/T1PKS2 cR, 1274 bp), d (T1PKS2 cF/T1PKS2 cR, 783 bp), and i (NPRS cF/NRPS cR, 756 bp). M: DNA marker.

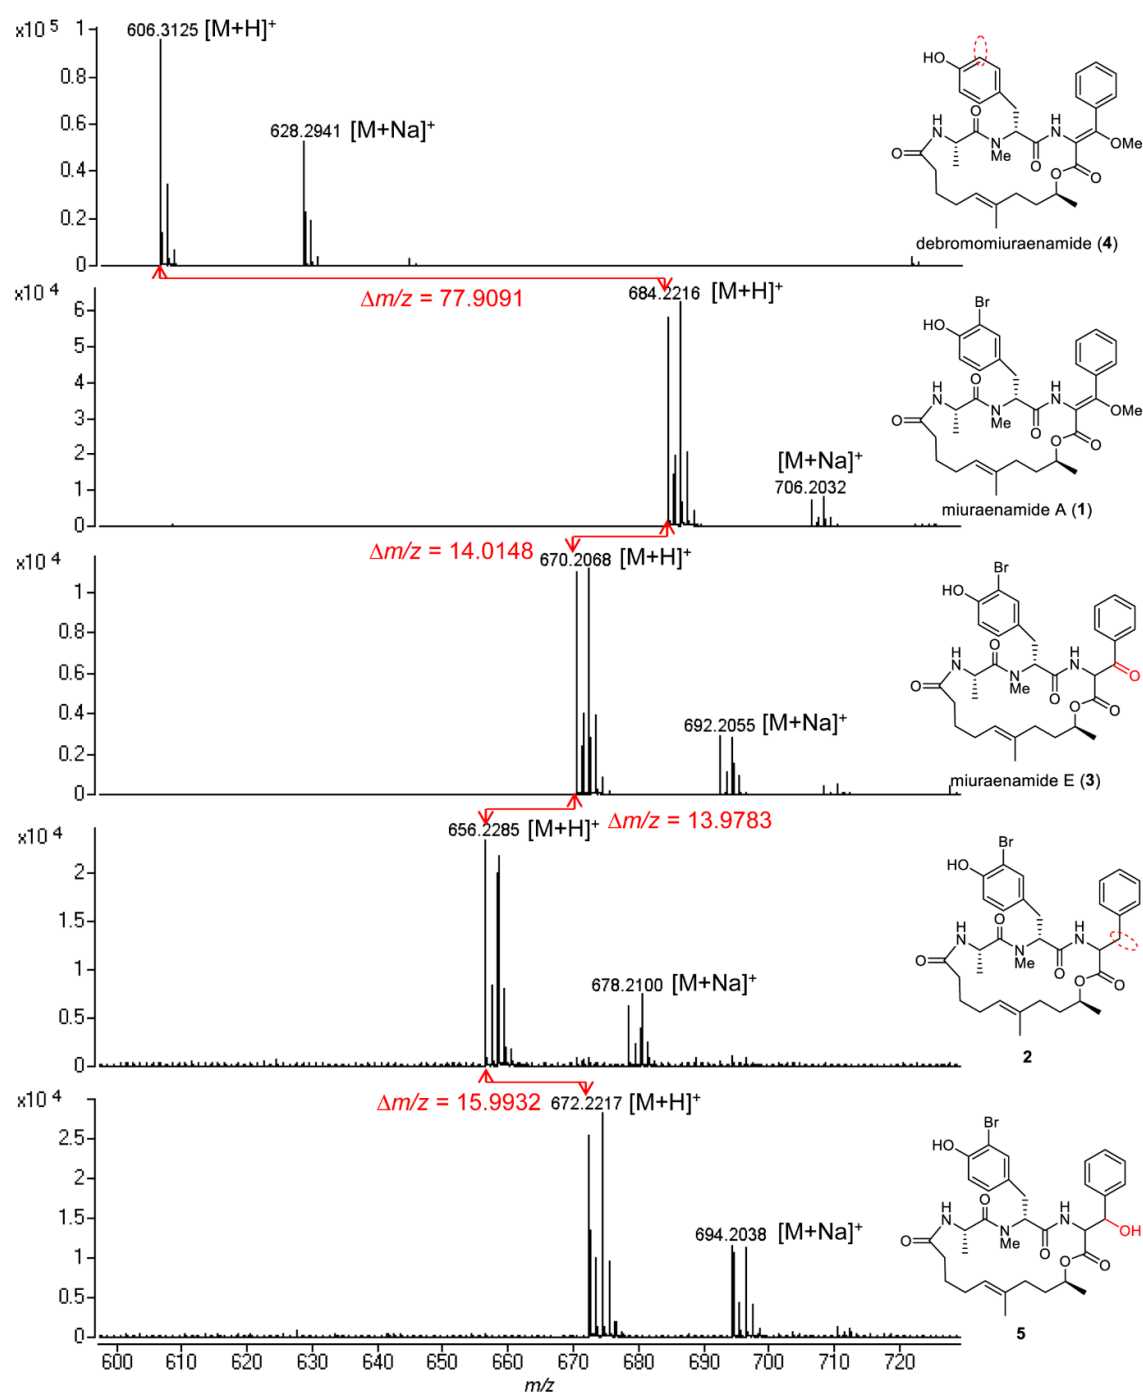

**Figure S10.** Mass spectra of miuraenamide A and its congeners. The structures of **2**, **4**, **5** are estimated by the molecular formulae compared with those of **1** and **3** and not verified by NMR.

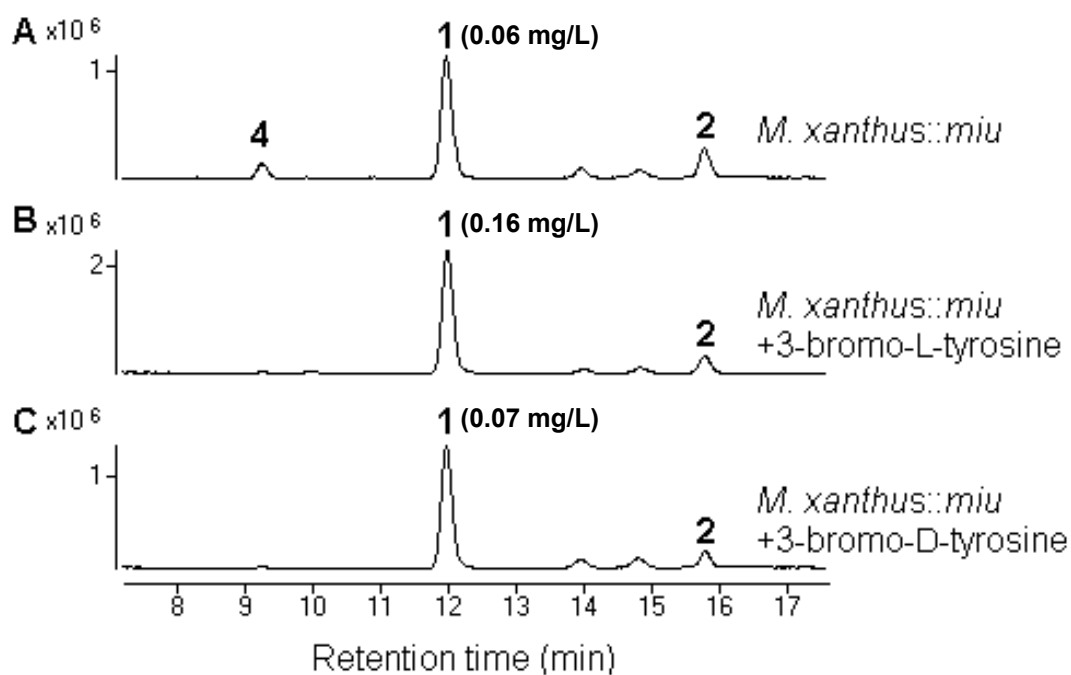

**Figure S11.** Production of miuraenamide A (**1**) and its congeners by *M. xanthus::miu* mutant fed on bromotyrosines. Extracted ion chromatographs (merged from  $m/z$  684.2216, 606.3125, 656.2285, 670.2068, and 672.2217) of the extracts of the heterologous producer *M. xanthus::miu* (A), fed on 3-bromo-L-tyrosine (B), fed on 3-bromo-D-tyrosine (C).

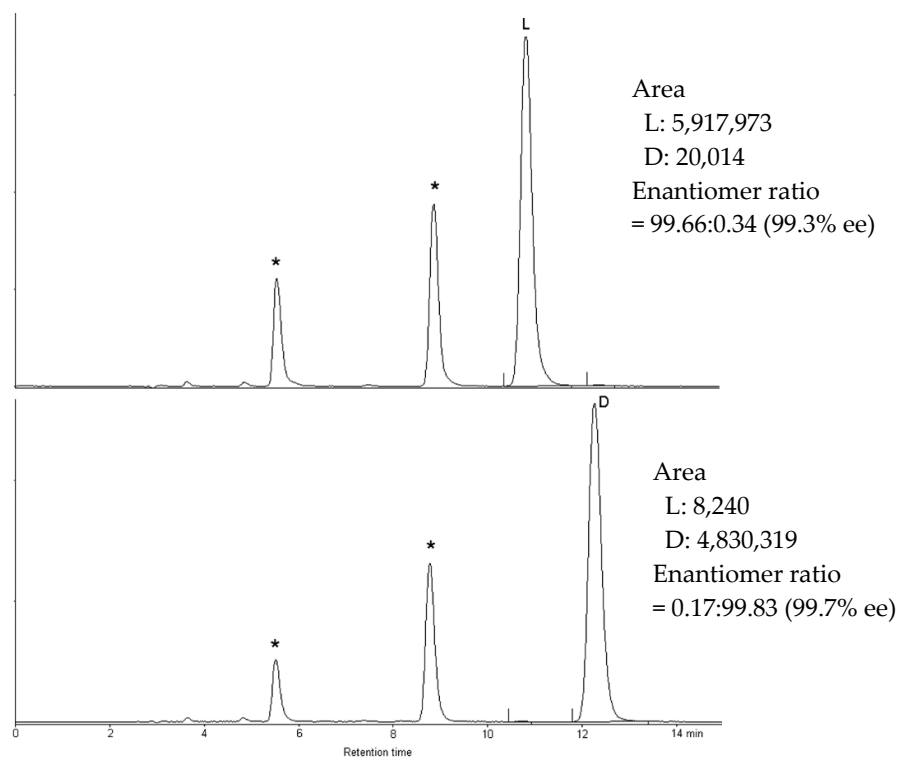

**Figure S12.** Enantiomeric purity of 3-bromo-D and L-tyrosines determined by Marfey's method. Column: Develosil ODS-UG-5 (4.6 × 250 mm), Solvent: 40% MeCN-0.1% TFA, flow: 1 mL/min, detection: 320 nm. \* Impurities originated from Marfey's reagent (FDAA).
